# Supplementary material for: Novel XIAP mutation causing enhanced spontaneous apoptosis and disturbed NOD2 signalling in a patient with atypical adult-onset Crohn’s disease
Source: PubMed Central journal article supplement (PMC7280281; doi:10.1038/s41419-020-2652-4), 2020-06-08

# NOVEL *XIAP* MUTATION CAUSING ENHANCED SPONTANEOUS APOPTOSIS AND DISTURBED NOD2 SIGNALLING IN A PATIENT WITH ATYPICAL ADULT ONSET CROHN'S DISEASE

**Short running title:** A novel XIAP mutation

Zuzana Parackova<sup>1</sup>, Tomas Milota<sup>1</sup>, Petra Vrabcova<sup>1</sup>, Jitka Smetanová<sup>1</sup>, Michael Svaton<sup>2</sup>, Tomas Freiburger<sup>3, 4</sup>, Veronika Kanderova<sup>2</sup>, Anna Sediva<sup>1</sup>

<sup>1</sup> Department of Immunology, 2<sup>nd</sup> Faculty of Medicine Charles University, University Hospital in Motol, V Uvalu 84, Prague, Czech Republic

<sup>2</sup> CLIP - Childhood Leukaemia Investigation Prague, Department of Paediatric Haematology and Oncology, 2<sup>nd</sup> Faculty of Medicine, Charles University and University Hospital Motol, Prague, Czech Republic

<sup>3</sup> Molecular Genetics Laboratory, Center of Cardiovascular Surgery and Transplantation, Brno, Czech Republic

<sup>4</sup> Faculty of Medicine, Masaryk University, Brno, Czech Republic

## **Correspondence:**

Zuzana Paračková, Department of Immunology, 2<sup>nd</sup> Faculty of Medicine Charles University, Faculty Hospital in Motol, V Uvalu 84, Prague 5, 15006, +420224435971, [zuzana.parackova@fnmotol.cz](mailto:zuzana.parackova@fnmotol.cz)

**Keywords:** XIAP, BIRC4, XLP, NOD2, apoptosis, HLH, IFN $\gamma$ , Crohn's disease

**Supplementary Table 1:** Laboratory values during HLH episode and remission, including complete blood count and differential lymphocyte subpopulations (NK – natural killer), biochemistry (ALT – alanine aminotransferase, AST – aspartate aminotransferase, GGT- gamma-glutamyl transferase, ALP – alkaline phosphatase, bili – bilirubin, TAG – triacylglycerol, and Chol – cholesterol) and inflammatory markers (C reactive protein),  $\uparrow\downarrow$  - value above and below the reference range, respectively.

| <b>Hematology</b>   | <b>HLH</b>      | <b>Remission</b> | <b>Reference value</b> |
|---------------------|-----------------|------------------|------------------------|
| Leukocytes (E9/l)   | ↓ <b>2.8</b>    | 5.3              | 4-10                   |
| Neutrophils (%)     | ↑ <b>77.5</b>   | 58.8             | 45-70                  |
| Monocytes (%)       | ↓ <b>15.5</b>   | ↓ <b>9.9</b>     | 20-45                  |
| Bazophiles (%)      | ↑ <b>5.6</b>    | 0.2              | 0-2                    |
| Eozinophiles(%)     | 0               | 1.1              | 0-5                    |
| HGB (g/l)           | ↓ <b>0</b>      | 147              | 135-175                |
| PLT (E9/l)          | ↓ <b>75</b>     | 208              | 150-400                |
| Lymphocytes (%)     | ↑ <b>67</b>     | 29.8             | 20-45                  |
| CD3 (%)             | 83              | 86               | 57-94                  |
| CD4 (%)             | 40              | 47               | 20-70                  |
| CD8 (%)             | 37              | 33               | 10-48                  |
| CD19 (%)            | 12              | 9                | 4-23                   |
| NK (%)              | ↓ <b>3</b>      | ↓ <b>4</b>       | 6-33                   |
| CD3 HLADR (%)       | ↑ <b>17</b>     | 15               | 0-15                   |
| <b>Biochemistry</b> | <b>HLH</b>      | <b>Remission</b> | <b>Reference value</b> |
| ALT (ukat/l)        | 0.4             | 0.45             | 0.17-0.78              |
| AST (ukat/l)        | 0.18            | 0.32             | 0.16-0.72              |
| GGT (ukat/l)        | ↑ <b>9.01</b>   | 0.66             | 0.14-0.84              |
| ALP (ukat/l)        | ↓ <b>0.4</b>    | 1.38             | 0.66-2.20              |
| Bili (umol/l)       | ↑ <b>24</b>     | 13.5             | 5-21                   |
| TAG (mmol/l)        | ↑ <b>4.65</b>   | ↑ <b>2</b>       | 0.7-1.7                |
| Chol (mmol/l)       | 4.4             | ↑ <b>5.5</b>     | 3.4-5.0                |
| Fe (umol/l)         | ↓ <b>1.9</b>    | 11.1             | 7.2-29                 |
| Ferritin (ug/l)     | ↑ <b>16,500</b> | 62               | 22-322                 |
| CRP (mg/l)          | ↑ <b>14</b>     | ↑ <b>55.3</b>    | 0-5                    |

**Supplementary Figure 1: A.** Patient's clinical manifestations and therapy. Uncropped membranes from the Western blot analyses of **B.** XIAP, **C.**  $\beta$  actin **D.** and GAPDH. Expression of housekeeping proteins **E.** tubulin and HSP90 in patient and control PBMCs.

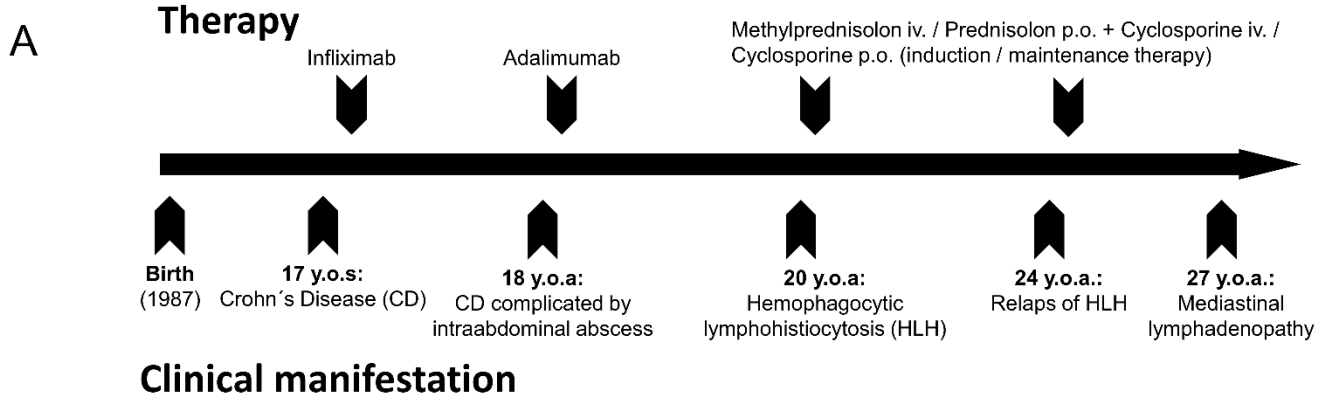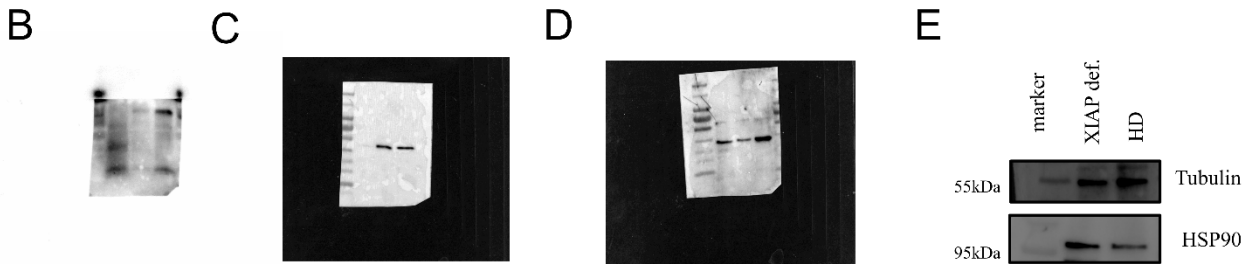

**Supplementary Figure 2: Apoptosis.** Patient PBMCs were treated with staurosporine (1 mmol) and 50 ng/ml PMA for 2, 4 and 6 hours or left untreated for an additional 24 and 48 hours. When indicated the cells were pre-treated with 20 $\mu$ M Z-VAD-fmk for 30 minutes. The level of spontaneous and induced apoptosis was detected by **A. FLICA**, in which the fluorescein-labelled inhibitor Z-YVAD-fmk is bound to activated caspase -3 and 7, signal as detected by flow cytometry. **B.** The level of spontaneous apoptosis detected by flow cytometry of cells stained with Annexin V and DAPI. Annexin+ DAPI cells were considered to be undergoing early apoptosis.

**A**

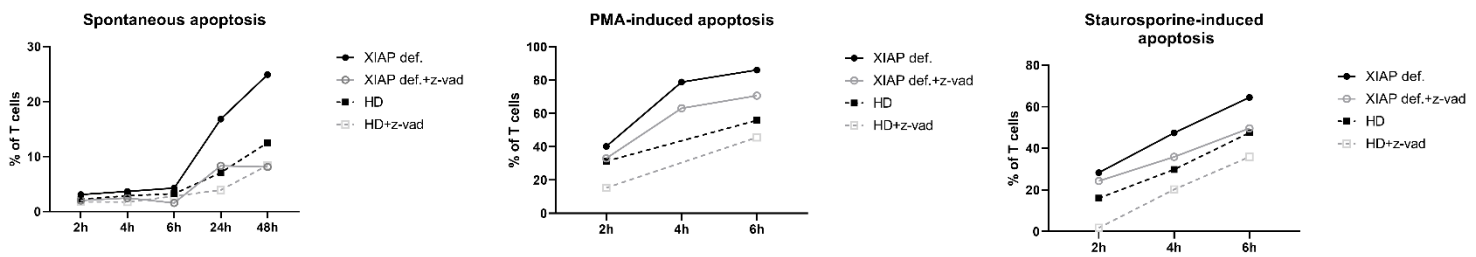

**B**

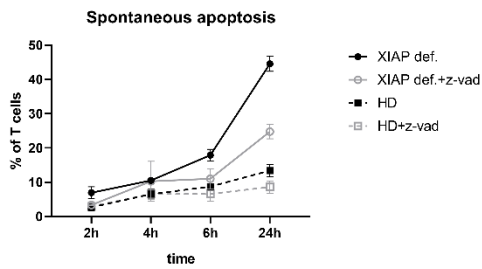

**Supplementary Figure 3: A.** MAPK and NF $\kappa$ B signalling pathways activation upon PMA or TNF $\alpha$  stimulation for 20 minutes of patient and control peripheral blood. **B.** Uncropped membranes from the Western blot analyses for MAPK and NF $\kappa$ B signalling pathways activation. **C.** CD69 expression on T cells expressed as MFI. **D.** T cell proliferation. Proliferating cells are expressed as Ki67+CD4+ T cells.

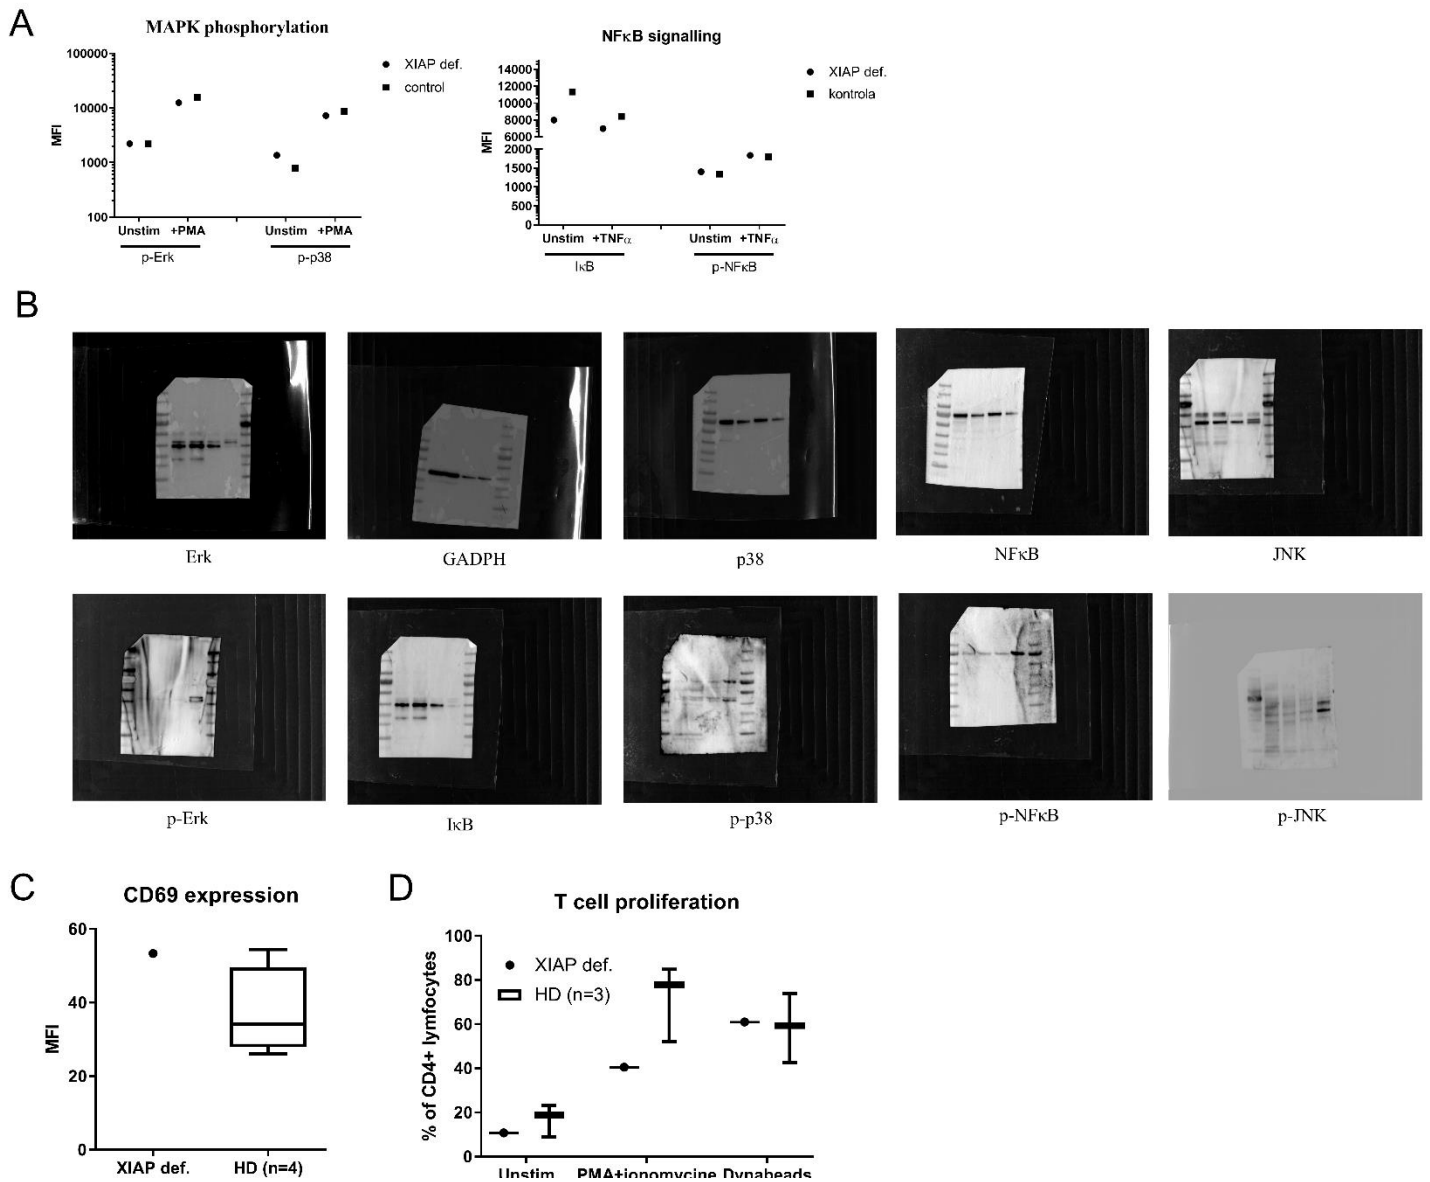

Supplement: 41419_2020_2652_MOESM7_ESM.pdf [file 41419_2020_2652_MOESM7_ESM.pdf]
